# Supplementary material for: Compound A Increases Cell Infiltration in Target Organs of Acute Graft-versus-Host Disease (aGVHD) in a Mouse Model
Source: MDPI journal article supplement (doi:10.3390/molecules26144237), 2021-07-12

# Compound A Increases Cell Infiltration in Target Organs of Acute Graft-Versus-Host Disease (aGVHD) in a Mouse Model

Abdellatif Bouazzaoui <sup>1,2,3,\*</sup>, Ahmed A. H. Abdellatif <sup>4,5</sup>, Faisal A. Al-Allaf <sup>1</sup>, Neda M. Bogari <sup>1</sup>, Mohiuddin M. Taher <sup>1,2</sup>, Mohammad Athar <sup>1,2</sup>, Thomas Schubert <sup>6</sup>, Turki M. Habeebullah <sup>7</sup> and Sameer H. Qari <sup>8</sup>

<sup>1</sup> Department of Medical Genetics, Faculty of Medicine, Umm Al-Qura University, 21955 Makkah, Saudi Arabia; faallaf@uqu.edu.sa (F.A.A.-A.); nmbogari@uqu.edu.sa (N.M.B.); taher23223@yahoo.com (M.M.T.); athar80@gmail.com (M.A.)

<sup>2</sup> Science and Technology Unit, Umm Al-Qura University, 21955 Makkah, Saudi Arabia

<sup>3</sup> Medical Clinic 3–Hematology/Oncology, University Hospital Regensburg, Franz-Josef-Strauß-Allee 11, 93053 Regensburg; Germany

<sup>4</sup> Department of Pharmaceutics, College of Pharmacy, Qassim University, 51452 Qassim, Saudi Arabia; a.abdellatif@qu.edu.sa

<sup>5</sup> Department of Pharmaceutics and Industrial Pharmacy, Faculty of Pharmacy, Al-Azhar University, 71524 Assiut, Egypt

<sup>6</sup> Institut für angewandte Pathologie Speyer, Alter Postweg 1, 67346 Speyer, Germany; schubert@pathospeyer.de

<sup>7</sup> Environment and Health Research Department, The Custodian of the Two Holy Mosques Institute for Hajj and Umrah Research, Umm Al-Qura University, 21955 Makkah, Saudi Arabia; tmhabeebullah@uqu.edu.sa

<sup>8</sup> Biology Department, Aljumu'um University College, Umm Al-Qura University, 21955 Makkah, Saudi Arabia; shqari@uqu.edu.sa

\* Correspondence: ab1971@hotmail.de or alazzaoui@uqu.edu.sa; Tel.: +966571297636

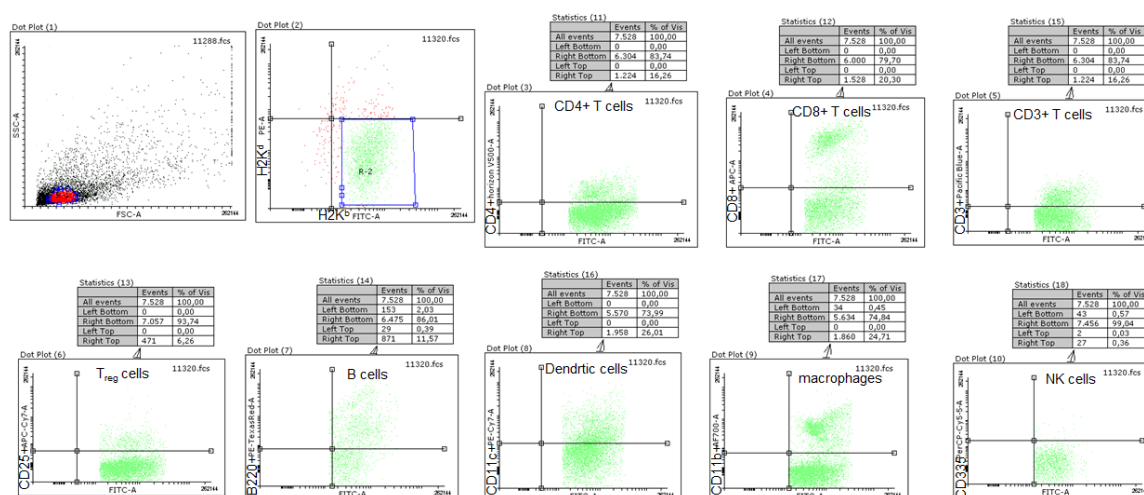

Supplement: s1 [file s1]
